# Supplementary material
Source: publisher figshare collection journal article supplement (https://karger.figshare.com/ndownloader/files/36429012)
Supplement: Supplementary file 1 [file 36429012]

**Table S2: Expression of HNA-2 in Indians based on sex**

| **Gender** | **n** | **Percentage expression of HNA-2 in Indians** | | | |
| --- | --- | --- | --- | --- | --- |
| **< 5%** | **5-39.9%** | **40-59.9%** | **≥ 60%** |
| **Negative** | **Low** | **Intermediate** | **High** |
| **Females** | 102 (11.85%) | 0* | 16 (2.19%)* | 35 (3.98%)* | 51 (11.85%)* |
| **Males** | 902 (88.15%) | 12 (1.33%)* | 170 (16.24%)* | 304 (29.68%)* | 416 (41.04%)* |
| **Total (overall)** | **1004** | **12 (1.2%)** | **186 (18.43%)** | **339 (33.67%)** | **467 (46.71%)** |

**Values represented are calculated within the same sex group*
